# Supplementary material for: Global Molecular Response of Paracoccidioides brasiliensis to Zinc Deprivation: Analyses at Transcript, Protein and MicroRNA Levels
Source: MDPI journal article supplement (doi:10.3390/jof9030281), 2023-02-21
Supplement: s1 [file s1]

**Table S3.** Proteins decreased at 24 hours of zinc deprivation and their functional classification.

| Accession Numbers                           | Protein designation                                     | Score   | Fold change | Metals            |
|---------------------------------------------|---------------------------------------------------------|---------|-------------|-------------------|
| METABOLISM                                  |                                                         |         |             |                   |
| amino acid metabolism                       |                                                         |         |             |                   |
| PADG_01928                                  | S-adenosylmethionine synthase                           | 2873.68 | 0.477113911 | K, Mg, Co, Ca, Na |
| PADG_06319                                  | Glutamate decarboxylase                                 | 533.91  | *           | Na                |
| PADG_01564                                  | Methylmalonate-semialdehyde dehydrogenase (Acylating)   | 655.53  | *           | K, Mg, Rb         |
| PADG_05492                                  | serine 3-dehydrogenase                                  | 1010.48 | *           | Na                |
| PADG_06756                                  | Histidine biosynthesis trifunctional protein            | 663.29  | *           | Zn, Cd            |
| PADG_01718                                  | Saccharopine dehydrogenase [NADP+, L-glutamate-forming] | 744.64  | *           |                   |
| PADG_02347                                  | carboxypeptidase D                                      | 1159.76 | *           | Ni                |
| PADG_00211                                  | glycine dehydrogenase                                   | 1352.81 | *           |                   |
| PADG_02777                                  | Threonine synthase                                      | 1177.76 | *           |                   |
| PADG_03149                                  | Aminopeptidase                                          | 682.03  | *           | Zn, K, Mg, Ca, Na |
| nitrogen, sulfur and selenium metabolism    |                                                         |         |             |                   |
| PADG_07010                                  | Urease accessory protein UreG                           | 592.24  | *           | Mg, Zn, Ni        |
| PADG_11833                                  | amidohydrolase                                          | 1071.23 | *           | Hg, Na, Mg, As    |
| nucleotide/nucleoside/nucleobase metabolism |                                                         |         |             |                   |
| PADG_04828                                  | Adenylosuccinate lyase                                  | 929.76  | 0.26447725  | Ca, K, Mg         |
| PADG_04478                                  | Polynucleotide kinase 3'-phosphatase                    | 635.23  | *           | Mn, Mg            |
| C-compound and carbohydrate metabolism      |                                                         |         |             |                   |
| PADG_02719                                  | dTDP-4-dehydrorhamnose reductase                        | 634.61  | *           | Mg, Ca            |
| Threonine                                   | UDP-galactopyranose mutase                              | 700.81  | *           |                   |
| lipid, fatty acid and isoprenoid metabolism |                                                         |         |             |                   |
| PADG_12025                                  | glutaryl-CoA dehydrogenase                              | 586.5   | *           | Mg, Na, Ca        |
| PADG_03449                                  | Isopentenyl-diphosphate delta-isomerase                 | 641.37  | *           | Mn, Mg, Na        |
| PADG_01228                                  | 3-hydroxybutyryl-CoA dehydrogenase                      | 504.6   | *           |                   |

|                                                                    |                                                                          |         |             |                    |
|--------------------------------------------------------------------|--------------------------------------------------------------------------|---------|-------------|--------------------|
| metabolism of vitamins, cofactors, and prosthetic groups           |                                                                          |         |             |                    |
| PADG_05462                                                         | pyridoxamine 5'-phosphate oxidase                                        | 618.57  | *           |                    |
| secondary metabolism                                               |                                                                          |         |             |                    |
| PADG_05310                                                         | Leukotriene A(4) hydrolase                                               | 651.48  | *           | Yb, Zn             |
| PADG_04184                                                         | 2OG-Fe(II) oxygenase                                                     | 534.39  | *           | Fe, Mn, Ca, Ni, Zn |
| ENERGY                                                             |                                                                          |         |             |                    |
| glycolysis and gluconeogenesis                                     |                                                                          |         |             |                    |
| PADG_05109                                                         | 2,3-bisphosphoglycerate-independent phosphoglycerate mutase              | 664.84  | 0.193980045 | Mn, Co, Na, Zn, Mg |
| PADG_03631                                                         | phosphoglycerate mutase family protein                                   | 796.38  | *           |                    |
| PADG_02063                                                         | Pyruvate dehydrogenase (Acetyl-transferring) E1 component, alpha subunit | 544.78  | *           | K, Mg, Mn, Na      |
| PADG_04687                                                         | Glucose 1-dehydrogenase                                                  | 1840.84 | *           | Mg, Zn             |
| tricarboxylic-acid pathway (citrate cycle, Krebs cycle, TCA cycle) |                                                                          |         |             |                    |
| PADG_08119                                                         | Fumarate hydratase, mitochondrial                                        | 535.55  | *           | Na, Co, Ca         |
| electron transport and membrane-associated energy conservation     |                                                                          |         |             |                    |
| PADG_05343                                                         | NADH-ubiquinone oxidoreductase 21.3 kDa subunit                          | 549.32  | *           |                    |
| PADG_06196                                                         | 12-oxophytodienoate reductase                                            | 2627.36 | 0.65050909  | Mg, Na             |
| PADG_00408                                                         | cytochrome C                                                             | 1044.12 | 0.244143291 |                    |
| PADG_00893                                                         | F0F1 ATP synthase subunit gamma                                          | 626.11  | *           |                    |
| PADG_04559                                                         | Cytochrome b5 heme-binding domain-containing protein                     | 5040.49 | *           | Fe                 |
| PADG_08460                                                         | NADPH dehydrogenase                                                      | 1123.64 | *           | Fe, Ca             |
| PADG_00052                                                         | Succinate dehydrogenase [ubiquinone] flavoprotein subunit, mitochondrial | 785.93  | *           | K, Ca, Na          |
| Fermentation                                                       |                                                                          |         |             |                    |
| PADG_11405                                                         | Alcohol dehydrogenase 1                                                  | 4049.86 | 0.045501958 | Zn                 |
| PADG_04701                                                         | alcohol dehydrogenase                                                    | 753.53  | *           | As, Zn, Mg, Mn, K  |
| oxidation of fatty acids                                           |                                                                          |         |             |                    |
| PADG_04687                                                         | Short-chain dehydrogenase                                                | 1840.84 | *           | Mg, Zn             |
| CELL CYCLE AND DNA PROCESSING                                      |                                                                          |         |             |                    |

|                                                   |                                                    |         |             |                                   |
|---------------------------------------------------|----------------------------------------------------|---------|-------------|-----------------------------------|
| PADG_01688                                        | DlpA domain-containing protein                     | 908.41  | *           | Mg                                |
| PADG_00466                                        | mitochondrial genome maintenance protein mgm101    | 1218.52 | *           |                                   |
| PADG_05798                                        | ssDNA binding protein, putative                    | 8976.85 | 0.663650253 | Ca                                |
| PADG_05157                                        | period circadian protein                           | 659.73  | *           |                                   |
| TRANSCRIPTION                                     |                                                    |         |             |                                   |
| PADG_05587                                        | U2 small nuclear ribonucleoprotein B               | 852.23  | *           |                                   |
| PROTEIN SYNTHESIS                                 |                                                    |         |             | Ca, Mg, Na                        |
| ribosome biogenesis                               |                                                    |         |             |                                   |
| PADG_12027                                        | ribosomal RNA small subunit methyltransferase NEP1 | 609.51  | *           |                                   |
| PADG_01387                                        | 60S ribosomal protein L7                           | 846.83  | *           |                                   |
| PADG_02249                                        | 60S ribosomal protein L2                           | 2277.57 | *           |                                   |
| PADG_12365                                        | 40S ribosomal protein S8                           | 745.03  | *           |                                   |
| PADG_00046                                        | mitochondrial ribosomal protein L37                | 968.54  | *           |                                   |
| PADG_03767                                        | Ribosomal RNA small subunit methyltransferase      | 573.08  | *           |                                   |
| Translation                                       |                                                    |         |             |                                   |
| PADG_08424                                        | CD2 antigen cytoplasmic tail-binding protein 2     | 964.19  | *           |                                   |
| PADG_11711                                        | ATP-dependent RNA helicase eIF4A                   | 924.69  | *           |                                   |
| PADG_07888                                        | Eukaryotic translation initiation factor 5A        | 920.62  | *           | Zn, Mg, Al, Be,<br>W              |
| PADG_05642                                        | Signal recognition particle, SRP9                  | 747.2   | *           |                                   |
| PROTEIN FATE (folding, modification, destination) |                                                    |         |             |                                   |
| protein folding and stabilization                 |                                                    |         |             |                                   |
| PADG_03211                                        | Protein ROT1                                       | 613.03  | *           |                                   |
| protein modification                              |                                                    |         |             | Mn, Zn, Ca, Mg,<br>As, Na, Ca, Cd |
| C1GEY4                                            | Probable Xaa-Pro aminopeptidase                    | 841.88  | *           |                                   |
| PADG_03913                                        | Serine/threonine-protein kinase                    | 2303.12 | *           | Zn                                |
| PADG_01086                                        | chaperone protein dnaJ 3                           | 800.24  | *           |                                   |
| protein/peptide degradation                       |                                                    |         |             | Ni, Pb, Na, Mg,<br>Mn, Cd, Sm, Zn |
| PADG_01852                                        | Hsc70 cochaperone (SGT), putative                  | 610.66  | 0.527292432 | K                                 |

|                                                                                 |                                                     |         |             |                           |
|---------------------------------------------------------------------------------|-----------------------------------------------------|---------|-------------|---------------------------|
| PADG_06290                                                                      | Proteasome endopeptidase complex                    | 1002.35 | *           | Zn, Mg, Co, As            |
| PADG_04167                                                                      | aspartyl aminopeptidase                             | 1309.5  | 0.663650253 | Mg                        |
| PADG_03967                                                                      | proteasome component C5                             | 591.98  | *           |                           |
| PROTEIN WITH BINDING FUNCTION OR COFACTOR REQUIREMENT (structural or catalytic) |                                                     |         |             |                           |
| nucleic acid binding                                                            |                                                     |         |             |                           |
| PADG_07670                                                                      | SAP domain protein                                  | 831.4   | *           |                           |
| PADG_11345                                                                      | mariner-Tc1 transposon family protein               | 687.24  | *           |                           |
| CELLULAR TRANSPORT, TRANSPORT FACILITIES AND TRANSPORT ROUTES                   |                                                     |         |             |                           |
| PADG_02022                                                                      | Clathrin light chain                                | 676.86  | *           |                           |
| PADG_02134                                                                      | Coatomer subunit epsilon                            | 617.02  | *           |                           |
| REGULATION OF METABOLISM AND PROTEIN FUNCTION                                   |                                                     |         |             | Ca, Mg, Ni, Na            |
| PADG_02017                                                                      | Calmodulin                                          | 1582.71 | *           |                           |
| CELLULAR COMMUNICATION/SIGNAL TRANSDUCTION MECHANISM                            |                                                     |         |             |                           |
| PADG_03120                                                                      | RIC8                                                | 524.98  | *           |                           |
| PADG_01285                                                                      | gamma-aminobutyric acid A receptor                  | 636.29  | *           |                           |
| PADG_07506                                                                      | Protein phosphatase inhibitor 2                     | 2068.58 | *           |                           |
| CELL RESCUE, DEFENSE AND VIRULENCE                                              |                                                     |         |             |                           |
| stress response                                                                 |                                                     |         |             |                           |
| PADG_04907                                                                      | Hsp9/Hsp12 family heat shock protein                | 579.98  | *           |                           |
| Detoxification                                                                  |                                                     |         |             |                           |
| PADG_07627                                                                      | 4-carboxymuconolactone decarboxylase family protein | 923.04  | *           |                           |
| PADG_01551                                                                      | Thioredoxin reductase                               | 938.13  | *           | Mg, Au, Na, Cd, Ca, K, As |
| PADG_03276                                                                      | S-(hydroxymethyl)glutathione dehydrogenase          | 675.68  | *           | Zn, K, Cd, Cu             |
| PADG_03403                                                                      | aldehyde dehydrogenase                              | 737.52  | *           | Mn, Mg, Na                |
| CELL FATE                                                                       |                                                     |         |             |                           |
| PADG_06568                                                                      | TCTP family protein                                 | 2990.31 | 0.576949804 |                           |
| PADG_04966                                                                      | phosducin family protein                            | 725.9   | *           | Na                        |

| BIOGENESIS OF CELLULAR COMPONENTS |                              |         |   |  |
|-----------------------------------|------------------------------|---------|---|--|
| cytoskeleton/structural proteins  |                              |         |   |  |
| PADG_05893                        | myosin-2                     | 542.56  | * |  |
| PADG_05239                        | Tubulin-specific chaperone A | 740.19  | * |  |
| UNCLASSIFIED PROTEINS             |                              |         |   |  |
| PADG_11913                        | Uncharacterized protein      | 1706.2  | * |  |
| PADG_08409                        | Uncharacterized protein      | 1570.85 | * |  |
| PADG_12242                        | Uncharacterized protein      | 751.42  | * |  |
| PADG_06179                        | Uncharacterized protein      | 548.48  | * |  |

\* Proteins found only under the control condition.
