# Supplementary material for: Global Molecular Response of Paracoccidioides brasiliensis to Zinc Deprivation: Analyses at Transcript, Protein and MicroRNA Levels
Source: MDPI journal article supplement (doi:10.3390/jof9030281), 2023-02-21
Supplement: s1 [file s1]

**Table S2.** Potential mRNAs encoding proteins targets of PbZn-miR-4, repressed by zinc deprivation, related to cellular transport.

| MicroRNA   | Supercontig            | Targets                                                                        | MFE            | Functional classification | P-value  |       |
|------------|------------------------|--------------------------------------------------------------------------------|----------------|---------------------------|----------|-------|
| PbZn-miR-4 | Supercontig_2.14_28062 | PADG_00180/Got1 family protein                                                 | -26.2 kcal/mol | Transport                 | 0.014972 | 3'UTR |
| PbZn-miR-4 | Supercontig_2.14_28062 | PADG_01941/HIG1 domain-containing protein                                      | -25.8 kcal/mol | Transport                 | 0.017461 | 3'UTR |
| PbZn-miR-4 | Supercontig_2.14_28062 | PADG_02798/family integral membrane protein                                    | -26.0 kcal/mol | Transport                 | 0.016270 | 3'UTR |
| PbZn-miR-4 | Supercontig_2.14_28062 | PADG_03068/YeeE/YedE family integral membrane protein                          | -25.2 kcal/mol | Transport                 | 0.023056 | 3'UTR |
| PbZn-miR-4 | Supercontig_2.14_28062 | PADG_03862/RING-type domain-containing protein                                 | -24.6 kcal/mol | Transport                 | 0.029065 | 3'UTR |
| PbZn-miR-4 | Supercontig_2.14_28062 | PADG_04027/endoplasmic reticulum-Golgi intermediate compartment protein        | -23.7 kcal/mol | Transport                 | 0.042097 | 3'UTR |
| PbZn-miR-4 | Supercontig_2.14_28062 | PADG_04037/MFS multidrug transporter                                           | -24.0 kcal/mol | Transport                 | 0.037217 | 3'UTR |
| PbZn-miR-4 | Supercontig_2.14_28062 | PADG_04160/MRS7 family protein                                                 | -25.3 kcal/mol | Transport                 | 0.021756 | 3'UTR |
| PbZn-miR-4 | Supercontig_2.14_28062 | PADG_04327/MFS multidrug transporter                                           | -25.4 kcal/mol | Transport                 | 0.020873 | 3'UTR |
| PbZn-miR-4 | Supercontig_2.14_28062 | PADG_04690/vesicle-associated membrane protein 4                               | -24.1 kcal/mol | Transport                 | 0.035425 | 3'UTR |
| PbZn-miR-4 | Supercontig_2.14_28062 | PADG_04861/rhomboid family protein                                             | -25.6 kcal/mol | Transport                 | 0.019211 | 3'UTR |
| PbZn-miR-4 | Supercontig_2.14_28062 | PADG_04883/ Protein transporter SEC24                                          | -23.6 kcal/mol | Transport                 | 0.043859 | 3'UTR |
| PbZn-miR-4 | Supercontig_2.14_28062 | PADG_06348/MFS transporter                                                     | -23.9 kcal/mol | Transport                 | 0.038779 | 3'UTR |
| PbZn-miR-4 | Supercontig_2.14_28062 | PADG_07230/TPR_REGION domain-containing protein                                | -24.4 kcal/mol | Transport                 | 0.031565 | 3'UTR |
| PbZn-miR-4 | Supercontig_2.14_28062 | PADG_07960/tetraspanin                                                         | -28.0 kcal/mol | Transport                 | 0.007070 | 3'UTR |
| PbZn-miR-4 | Supercontig_2.14_28062 | PADG_08567/zinc-regulated transporter 1 (ZRT1)                                 | -23.6 kcal/mol | Transport                 | 0.043859 | 3'UTR |
| PbZn-miR-4 | Supercontig_2.14_28062 | PADG_08687/Major facilitator superfamily domain, general substrate transporter | -23.4 kcal/mol | Transport                 | 0.047600 | 3'UTR |
| PbZn-miR-4 | Supercontig_2.14_28062 | PADG_11487/calcium transporter                                                 | -24.9 kcal/mol | Transport                 | 0.025676 | 3'UTR |
| PbZn-miR-4 | Supercontig_2.14_28062 | PADG_11514/Sodium/metabolite cotransporter like                                | -25.4 kcal/mol | Transport                 | 0.020873 | 3'UTR |
| PbZn-miR-4 | Supercontig_2.14_28062 | PADG_11722/sucrose transport protein                                           | -27.3 kcal/mol | Transport                 | 0.009469 | 3'UTR |
| PbZn-miR-4 | Supercontig_2.14_28062 | PADG_11728/AP-1 complex subunit beta-1                                         | -25.1 kcal/mol | Transport                 | 0.023636 | 3'UTR |
| PbZn-miR-4 | Supercontig_2.14_28062 | PADG_00470/ Ferric oxidoreductase domain-containing protein                    | -23.4 kcal/mol | Transport                 | 0.047600 | 5'UTR |
| PbZn-miR-4 | Supercontig_2.14_28062 | PADG_01298/ EF hand domain-containing protein                                  | -23.3 kcal/mol | Transport                 | 0.049384 | 5'UTR |
| PbZn-miR-4 | Supercontig_2.14_28062 | PADG_01471/ S-adenosylmethionine-dependent methyltransferase                   | -25.4 kcal/mol | Transport                 | 0.021047 | 5'UTR |
| PbZn-miR-4 | Supercontig_2.14_28062 | PADG_01528/ endoplasmic reticulum vesicle protein 25                           | -24.5 kcal/mol | Transport                 | 0.030290 | 5'UTR |

|            |                        |                                                                      |                |           |          |       |
|------------|------------------------|----------------------------------------------------------------------|----------------|-----------|----------|-------|
| PbZn-miR-4 | Supercontig_2.14_28062 | PADG_01662/ plasma membrane fusion protein PRM1                      | -24.0 kcal/mol | Transport | 0.037217 | 5'UTR |
| PbZn-miR-4 | Supercontig_2.14_28062 | PADG_02020/ syntaxin 16                                              | -23.3 kcal/mol | Transport | 0.049586 | 5'UTR |
| PbZn-miR-4 | Supercontig_2.14_28062 | PADG_02058/ von Willebrand and RING finger domain-containing protein | -23.9 kcal/mol | Transport | 0.039421 | 5'UTR |
| PbZn-miR-4 | Supercontig_2.14_28062 | PADG_02884/ calcium channel subunit Cch1                             | -23.4 kcal/mol | Transport | 0.047600 | 5'UTR |
| PbZn-miR-4 | Supercontig_2.14_28062 | PADG_04021/ MFS monocarboxylate transporter                          | -23.4 kcal/mol | Transport | 0.047406 | 5'UTR |
| PbZn-miR-4 | Supercontig_2.14_28062 | PADG_04941/ metal homeostasis protein bsd2                           | -27.2 kcal/mol | Transport | 0.009872 | 5'UTR |
| PbZn-miR-4 | Supercontig_2.14_28062 | PADG_06466/ transmembrane protein UsgS                               | -30.8 kcal/mol | Transport | 0.002192 | 5'UTR |
| PbZn-miR-4 | Supercontig_2.14_28062 | PADG_06814/ protein SSH4                                             | -25.2 kcal/mol | Transport | 0.022677 | 5'UTR |
| PbZn-miR-4 | Supercontig_2.14_28062 | PADG_06817/ translocation protein sec63                              | -24.8 kcal/mol | Transport | 0.026760 | 5'UTR |
| PbZn-miR-4 | Supercontig_2.14_28062 | PADG_07440/ dicarboxylic amino acid permease                         | -23.6 kcal/mol | Transport | 0.043859 | 5'UTR |
| PbZn-miR-4 | Supercontig_2.14_28062 | PADG_07610/ MFS transporter                                          | -23.3 kcal/mol | Transport | 0.049586 | 5'UTR |
| PbZn-miR-4 | Supercontig_2.14_28062 | PADG_08632/ ESCRT-II complex subunit VPS36                           | -23.6 kcal/mol | Transport | 0.043859 | 5'UTR |
| PbZn-miR-4 | Supercontig_2.14_28062 | PADG_11819/ GTPase-activating protein GYP7                           | -24.9 kcal/mol | Transport | 0.025676 | 5'UTR |
| PbZn-miR-4 | Supercontig_2.14_28062 | PADG_12160/ auxin Efflux Carrier superfamily                         | -23.4 kcal/mol | Transport | 0.047600 | 5'UTR |
