# Supplementary material for: Global Molecular Response of Paracoccidioides brasiliensis to Zinc Deprivation: Analyses at Transcript, Protein and MicroRNA Levels
Source: MDPI journal article supplement (doi:10.3390/jof9030281), 2023-02-21
Supplement: s1 [file s1]

**Table S5.** Number of sequencing reads mapped in each replicate of the conditions used in the study.

| Sample | Number of Readings |
|--------|--------------------|
| C1     | 26556055           |
| C2     | 24016136           |
| C3     | 21406924           |
| D1     | 23619046           |
| D2     | 23116878           |
| D3     | 24295698           |
