# Supplementary material for: Global Molecular Response of Paracoccidioides brasiliensis to Zinc Deprivation: Analyses at Transcript, Protein and MicroRNA Levels
Source: MDPI journal article supplement (doi:10.3390/jof9030281), 2023-02-21
Supplement: s1 [file s1]

**Table S4.** Proteins induced after 24 hours of zinc deprivation and their functional classification.

| Accession <i>P. brasiliensis</i>                         | Protein                                          | Score        | Fold change | Metals     |
|----------------------------------------------------------|--------------------------------------------------|--------------|-------------|------------|
| METABOLISM                                               |                                                  |              |             |            |
| amino acid metabolism                                    |                                                  |              |             |            |
| PADG_08034                                               | dienelactone hydrolase family protein            | 683.21       | *           |            |
| PADG_01404                                               | Aspartate aminotransferase                       | 1169.64      | *           | Mg, As     |
| PADG_03686                                               | Aspartate aminotransferase                       | 642.36       | *           | Mg, As     |
| PADG_08304                                               | Acetolactate synthase, small subunit             | 558.56       | *           | Mg, Ca     |
| PADG_03627                                               | 2-oxoisovalerate dehydrogenase subunit beta      | 1233.24      | *           | K, Mg      |
| PADG_02591                                               | amidase                                          | 1183.16      | *           | Cd         |
| PADG_05277                                               | Serine hydroxymethyltransferase                  | 924.36       | *           |            |
| PADG_01886                                               | Adenosylhomocysteinase                           | 2822.8       | 1.537257535 | Na,        |
| PADG_04718                                               | 2-methylcitrate dehydratase                      | 12853.8<br>3 | 1.537257535 |            |
| PADG_05301                                               | Cystathionine beta-synthase                      | 1035.09      | *           | Fe, Zn, Na |
| PADG_02625                                               | 4-coumarate-CoA ligase                           | 696.68       | *           | Mg, Ca     |
| nucleotide/nucleoside/nucleobase metabolism              |                                                  |              |             |            |
| PADG_07585                                               | Inosine-5'-monophosphate dehydrogenase           | 610.78       | *           | K, Mn, Mg  |
| phosphate metabolism                                     |                                                  |              |             |            |
| PADG_05822                                               | Pyridoxine biosynthesis protein pyroA            | 1499.88      | 2.075080647 | Mg, As     |
| lipid, fatty acid and isoprenoid metabolism              |                                                  |              |             |            |
| PADG_05783                                               | farnesyl pyrophosphate synthetase                | 643.26       | 5.989452238 | Mg, Zn     |
| PADG_06876                                               | 3-hydroxyisobutyryl-CoA hydrolase, mitochondrial | 2433.19      | 2.054433269 | Mg, Ca, Zn |
| metabolism of vitamins, cofactors, and prosthetic groups |                                                  |              |             |            |
| PADG_00443                                               | Dihydropteroate synthase                         | 971.68       | 1.521961536 | Na         |
| PADG_05474                                               | thiamin pyrophosphokinase-related protein        | 658.69       | *           |            |
| ENERGY                                                   |                                                  |              |             |            |
| glycolysis and gluconeogenesis                           |                                                  |              |             |            |
| PADG_00451                                               | Glucose-6-phosphate isomerase                    | 549.25       | 2.386910865 | Ca, Na     |

|                                                                    |                                                                  |         |             |                        |
|--------------------------------------------------------------------|------------------------------------------------------------------|---------|-------------|------------------------|
| PADG_04165                                                         | pyruvate dehydrogenase complex component Pdx1                    | 901.91  | 3.095656485 |                        |
| PADG_03813                                                         | Phosphotransferase                                               | 1815.11 | *           | Ca, K, Mg, Na          |
| PADG_03118                                                         | Glucose-6-phosphate 1-epimerase                                  | 2313.56 | 1.786038401 | Na, Ba                 |
| PADG_01278                                                         | Pyruvate kinase                                                  | 2588.75 | 1.768267039 | K, Mn, Mg,             |
| PADG_08503                                                         | Phosphoenolpyruvate carboxykinase [ATP]                          | 924.76  | 1.521961536 | Mg, Mn, Ca, Al, Na     |
| PADG_01896                                                         | Phosphoglycerate kinase                                          | 700.89  | 1.896480852 | Mg, Na, Ca, Al, K, Be  |
| PADG_00714                                                         | Pyruvate decarboxylase                                           | 1271.04 | 3.896193358 | Mg                     |
| pentose-phosphate pathway                                          |                                                                  |         |             |                        |
| PADG_03651                                                         | 6-phosphogluconate dehydrogenase, decarboxylating                | 794.91  | *           | As                     |
| PADG_04604                                                         | Transketolase                                                    | 769.52  | 1.973877746 | Ca, Mg, Na             |
| PADG_07771                                                         | 6-phosphogluconolactonase                                        | 1307.77 | 1.858928051 | Hg, Zn, K, Na, Cu      |
| tricarboxylic-acid pathway (citrate cycle, Krebs cycle, TCA cycle) |                                                                  |         |             |                        |
| PADG_05904                                                         | dihydrolipoamide succinyltransferase                             | 706.2   | *           | Mg, Ca                 |
| PADG_02805                                                         | Isocitrate dehydrogenase [NAD] subunit, mitochondrial            | 778.35  | *           | Ca, Zn, Mg, Na, Mn     |
| PADG_02260                                                         | Succinate--CoA ligase [ADP-forming] subunit alpha, mitochondrial | 700.26  | 1.858928051 | Mg, Na                 |
| electron transport and membrane-associated energy conservation     |                                                                  |         |             |                        |
| PADG_04501                                                         | Cytochrome b-c1 complex subunit 7                                | 1785.44 | 1.993715528 |                        |
| PADG_03559                                                         | cytochrome b5                                                    | 1158.52 | 2.316366916 | Fe, Mg, Ca, Na, Cu, Zn |
| PADG_07042                                                         | ATP synthase F1, delta subunit                                   | 826.59  | *           |                        |
| PADG_02578                                                         | ATP synthase subunit 4, mitochondrial                            | 637.32  | *           |                        |
| PADG_11513                                                         | NADH-ubiquinone oxidoreductase                                   | 729     | *           |                        |
| PADG_08394                                                         | cytochrome b-c1 complex subunit 2                                | 674.27  | *           | Fe, Mg, Ca, Na, Cu     |
| PADG_05290                                                         | cytochrome b5                                                    | 631.58  | *           | Fe, Mg, Ca, Na, Cu     |
| PADG_00171                                                         | cytochrome b2                                                    | 922.14  | 1.858928051 | Fe, Mg,                |
| PADG_07813                                                         | ATP synthase subunit gamma                                       | 628.12  | 1.665291179 |                        |
| PADG_11657                                                         | ATP-binding protein                                              | 4778.75 | *           |                        |

|                                                          |                                                                              |         |             |                    |
|----------------------------------------------------------|------------------------------------------------------------------------------|---------|-------------|--------------------|
| PADG_08152                                               | cytochrome oxidase c                                                         | 1134.4  | *           |                    |
| PADG_06766                                               | Mitochondrial-processing peptidase subunit beta                              | 577.46  | 1.750672504 | Zn                 |
| Respiration                                              |                                                                              |         |             |                    |
| PADG_04099                                               | Phosphoribosylaminoimidazolecarboxamide formyltransferase/IMP cyclohydrolase | 2320.17 | 2.013752683 | K, Mg              |
| metabolism of energy reserves (e.g. glycogen, trehalose) |                                                                              |         |             |                    |
| PADG_02145                                               | Alpha-1,4 glucan phosphorylase                                               | 719.83  | *           | V                  |
| oxidation of fatty acids                                 |                                                                              |         |             |                    |
| PADG_01687                                               | 3-ketoacyl-CoA thiolase                                                      | 2957.83 | 2.247907992 | Na, K              |
| PADG_08651                                               | Peroxisomal hydratase-dehydrogenase-epimerase                                | 641.95  | *           | Na                 |
| CELL CYCLE AND DNA PROCESSING                            |                                                                              |         |             |                    |
| PADG_04869                                               | HIT domain protein                                                           | 3516.93 | 2.386910865 | W, Zn, Mg, Na, Cu  |
| PADG_01032                                               | DNA-binding protein, 42 kDa                                                  | 1010.9  | *           | Co, Zn, Mn         |
| PADG_04056                                               | 14-3-3 family protein epsilon                                                | 3641.54 | 1.934792385 | Mg, Ni, As         |
| PADG_06942                                               | Kinetochore protein SPC24                                                    | 671.36  | *           |                    |
| PADG_06986                                               | calcineurin binding protein                                                  | 685.08  | *           |                    |
| PADG_02300                                               | phosphatase 2C Ptc3                                                          | 708.74  | *           | Mn, Zn, Ca, Mg, Pr |
| PADG_05683                                               | Cell division control protein 48                                             | 1040.03 | 3.158192834 | Mg                 |
| TRANSCRIPTION                                            |                                                                              |         |             |                    |
| PADG_02473                                               | pirin                                                                        | 797.42  | 3.034358438 | Cd, Fe, Co, Mn     |
| PADG_03696                                               | nuclear polyadenylated RNA-binding protein Nab2                              | 1151.31 | *           | Zn                 |
| PADG_06898                                               | U1 small nuclear ribonucleoprotein 70 kDa                                    | 1014.36 | *           | Mg                 |
| PADG_08036                                               | nmrA-like family                                                             | 673.95  | *           | Cu, Mg             |
| PADG_01442                                               | protein STB3                                                                 | 561.21  | 1.632316236 |                    |
| PROTEIN SYNTHESIS                                        |                                                                              |         |             |                    |
| PADG_00824                                               | telomere and ribosome associated protein Stm1                                | 772.23  | *           |                    |
| ribosome biogenesis                                      |                                                                              |         |             |                    |
| PADG_02445                                               | 40S ribosomal protein S15                                                    | 2011.43 | 1.993715528 |                    |
| PADG_01407                                               | 40S ribosomal protein                                                        | 1188.06 | 2.033991215 |                    |

|                            |                                                            |         |             |               |
|----------------------------|------------------------------------------------------------|---------|-------------|---------------|
| C1G1P4                     | 40S ribosomal protein S0                                   | 1323.72 | 2.117000017 |               |
| PADG_02056                 | Ribosomal protein L7/L12                                   | 1663.69 | 9.393331377 |               |
| PADG_11413                 | 60S ribosomal protein L9                                   | 3008.07 | *           |               |
| PADG_08605                 | 40S ribosomal protein S28                                  | 1235.95 | 2.773194711 |               |
| PADG_08238                 | 40S ribosomal protein S26                                  | 626.97  | *           | Zn            |
| PADG_06313                 | 40S ribosomal protein S18                                  | 819.2   | *           |               |
| PADG_04106                 | 60S ribosomal protein L11                                  | 789.58  | *           |               |
| PADG_05883                 | 60S ribosomal protein L25                                  | 1150.04 | 1.915540783 |               |
| PADG_12253                 | 60S ribosomal protein L3                                   | 731.56  | 1.858928051 |               |
| PADG_08715                 | 60S ribosomal protein L28                                  | 4593.55 | 1.768267039 |               |
| PADG_07870                 | 30S ribosomal protein S7                                   | 746.14  | 1.632316236 |               |
| PADG_02446                 | 60S acidic ribosomal protein P2                            | 5483.59 | 1.599994191 |               |
| PADG_08602                 | 40S ribosomal protein S2                                   | 838.59  | 1.521961536 |               |
| PADG_04475                 | Ribosomal protein S36, mitochondrial                       | 588.43  | *           |               |
| Translation                |                                                            |         |             |               |
| PADG_01949                 | Elongation factor Tu                                       | 3095.05 | 1.973877746 | Mg,           |
| PADG_08125                 | Elongation factor 2                                        | 2954.14 | 2.203396474 | Mg            |
| PADG_02759                 | ribosome recycling factor domain-containing protein        | 2606.2  | 2.363160728 | Hg            |
| C1GJ45                     | Eukaryotic translation initiation factor 3 subunit A       | 1263.28 | *           | Al, Mg, Cs    |
| PADG_07977                 | Eukaryotic translation initiation factor 1A, Y-chromosomal | 782.54  | *           |               |
| PADG_06265                 | elongation factor 1 gamma domain-containing protein        | 9834.64 | 1.87761057  | Cd, K, Na, Co |
| PADG_00692                 | Elongation factor 1-alpha                                  | 2644.04 | 1.750672504 | Mg            |
| PADG_04210                 | translation initiation factor 2 subunit beta               | 1405.18 | 1.716006899 | Zn            |
| PADG_07884                 | Polyadenylate-binding protein                              | 848.27  | 2.410899695 | Cd, Zn        |
| PADG_06160                 | eukaryotic translation initiation factor 2 subunit alpha   | 713.96  | *           | Zn            |
| PADG_01160                 | Eukaryotic translation initiation factor 3 subunit M       | 731.71  | *           |               |
| aminoacyl-tRNA-synthetases |                                                            |         |             |               |
| PADG_02484                 | Valine-tRNA ligase                                         | 713.25  | *           | Mg, Zn, Hg    |
| PADG_04962                 | Aspartate-tRNA(Asn) ligase                                 | 607.02  | 1.822118844 | Mg, Mn, Na    |

|                                                                                 |                                                  |         |             |                        |
|---------------------------------------------------------------------------------|--------------------------------------------------|---------|-------------|------------------------|
| PADG_01558                                                                      | histidyl-tRNA synthetase                         | 1252.2  | 1.648721271 | W, Na                  |
| PROTEIN FATE (folding, modification, destination)                               |                                                  |         |             |                        |
| PADG_12323                                                                      | Peptidyl-prolyl cis-trans isomerase              | 913.64  | *           | Au                     |
| protein modification                                                            |                                                  |         |             |                        |
| PADG_02637                                                                      | ubiquitin-conjugating enzyme                     | 631.98  | *           | Na, Ca, K, Co, Zn      |
| protein/peptide degradation                                                     |                                                  |         |             |                        |
| PADG_04076                                                                      | Proteasome subunit beta type                     | 758.58  | *           |                        |
| PADG_11128                                                                      | 26S protease regulatory subunit 6B               | 653.99  | *           | Mg                     |
| PADG_04088                                                                      | zinc metalloprotease                             | 868.12  | *           | Mg, Zn, Co, As, Ca     |
| PADG_12469                                                                      | 26S proteasome non-ATPase regulatory subunit 6   | 685.76  | *           |                        |
| PROTEIN WITH BINDING FUNCTION OR COFACTOR REQUIREMENT (structural or catalytic) |                                                  |         |             |                        |
| metal binding                                                                   |                                                  |         |             |                        |
| PADG_01717                                                                      | cupin domain-containing protein                  | 942.91  | *           |                        |
| C1FYL2                                                                          | Fe-S cluster assembly protein DRE2               | 810.7   | *           | Mg                     |
| CELLULAR TRANSPORT, TRANSPORT FACILITIES AND TRANSPORT ROUTES                   |                                                  |         |             |                        |
| PADG_07508                                                                      | phosphatidylinositol transfer protein SFH5       | 1074.3  | 2.386910865 |                        |
| PADG_02199                                                                      | transporter of Nicotinic Acid                    | 1743.85 | *           |                        |
| PADG_01243                                                                      | Rab GDP dissociation inhibito                    | 1188.11 | 1.616074385 | Mn, Zn, Ca, Pr, Mg     |
| PADG_06165                                                                      | glycolipid transferprotein HET-C2                | 639.09  | *           | Ni, Na                 |
| PADG_02619                                                                      | ER protein translocation                         | 732.21  | *           |                        |
| PADG_07714                                                                      | NTF2 and RRM domain protein                      | 1134.38 | 2.054433269 | K                      |
| CELLULAR COMMUNICATION/SIGNAL TRANSDUCTION MECHANISM                            |                                                  |         |             |                        |
| PADG_05608                                                                      | GTP-binding protein ypt7                         | 1135.71 | *           | Mg, Sr, K, Al, Be, Y   |
| PADG_00282                                                                      | GTP-binding protein ypt2                         | 678.73  | *           | Co, Mg, Ba, Al, Be, Zn |
| PADG_07281                                                                      | Guanine nucleotide-binding protein subunit alpha | 722.24  | *           | Al, Mg, Cs             |

|                                    |                                             |          |             |                          |  |
|------------------------------------|---------------------------------------------|----------|-------------|--------------------------|--|
| CELL RESCUE, DEFENSE AND VIRULENCE |                                             |          |             |                          |  |
| stress response                    |                                             |          |             |                          |  |
| PADG_05183                         | Glutaredoxin                                | 1817.33  | *           | Fe, Na                   |  |
| PADG_07477                         | ankyrin repeat protein (Yar1)               | 747.51   | *           |                          |  |
| PADG_05032                         | Hsp90 binding co-chaperone (Sba1)           | 837.22   | 1.840431425 |                          |  |
| PADG_08369                         | Hsp60-like protein                          | 17540.67 | 1.822118844 | Tl, Mg, Be, K            |  |
| PADG_01711                         | Hsp90 co-chaperone AHA1                     | 2639.66  | 1.632316236 |                          |  |
| PADG_07715                         | Hsp90-like protein                          | 4690.84  | 1.632316236 | Cd, Mg                   |  |
| PADG_07953                         | Peptidyl-prolyl cis-trans isomerase         | 1115.09  | 1.568312167 | Ca, Zn, Ni, Na, Cd       |  |
| PADG_02761                         | Hsp75-like protein                          | 2552.27  | 1.50681778  | Mg, Na, Ca, K, Zn, Mn, W |  |
| PADG_05081                         | Aldehyde dehydrogenase                      | 1213.69  | 4.903749092 | Na, Mg                   |  |
| PADG_02030                         | Hsp90 co-chaperone Cdc37                    | 3131.07  | 2.159766213 |                          |  |
| CELL FATE                          |                                             |          |             |                          |  |
| PADG_05491                         | GMF family protein                          | 681.93   | *           |                          |  |
| BIOGENESIS OF CELLULAR COMPONENTS  |                                             |          |             |                          |  |
| cytoskeleton/structural proteins   |                                             |          |             |                          |  |
| PADG_00945                         | Actin-related protein 2/3 complex subunit 5 | 760.69   | *           |                          |  |
| PADG_11857                         | mitotic checkpoint protein BUB3             | 828.18   | *           | Ca, Mg                   |  |
| PADG_12087                         | kinesin heavy chain                         | 1366.45  | *           |                          |  |
| PADG_12076                         | Actin                                       | 1136.22  | *           | Mg, Ca                   |  |
| PADG_00128                         | Tubulin alpha chain                         | 717.7    | 1.840431425 | Mg                       |  |
| PADG_00422                         | actin cytoskeleton protein (VIP1)           | 4990.33  | 1.750672504 |                          |  |
| PADG_08368                         | cofilin                                     | 1170.43  | 1.616074385 |                          |  |
| cell wall                          |                                             |          |             |                          |  |
| PADG_06336                         | cell lysis protein cwl1                     | 761.78   | 1.716006899 |                          |  |
| PADG_06759                         | putative chitin synthase                    | 697.53   | *           |                          |  |
| Golgi                              |                                             |          |             |                          |  |

|                       |                                  |         |             |           |
|-----------------------|----------------------------------|---------|-------------|-----------|
| PADG_00463            | DUF833 domain-containing protein | 708.37  | *           |           |
| Mitochondrion         |                                  |         |             |           |
| PADG_04242            | Sulfhydryl oxidase               | 746.32  | *           | Z, Na, Cd |
| UNCLASSIFIED PROTEINS |                                  |         |             |           |
| PADG_00674            | Uncharacterized protein          | 956.35  | 4.220696059 |           |
| PADG_02338            | Uncharacterized protein          | 2030.95 | 2.075080647 |           |
| PADG_07617            | Uncharacterized protein          | 871.57  | *           |           |
| PADG_11975            | Uncharacterized protein          | 711.97  | *           |           |
| PADG_05780            | Uncharacterized protein          | 775.21  | *           |           |
| PADG_12023            | Uncharacterized protein          | 1307.21 | *           |           |
| PADG_00939            | Uncharacterized protein          | 1155.7  | *           |           |

\* Proteins found only under the under-zinc deprivation condition.
