# Supplementary material for: Global Molecular Response of Paracoccidioides brasiliensis to Zinc Deprivation: Analyses at Transcript, Protein and MicroRNA Levels
Source: MDPI journal article supplement (doi:10.3390/jof9030281), 2023-02-21
Supplement: s1 [file s1]

**Table S1.** Some RNAs targets of PbZn-miR-1 and PbZn-miR-9.

| MicroRNA   | Targets                                                                   | MFE            | Functional classification | P-value  |        |
|------------|---------------------------------------------------------------------------|----------------|---------------------------|----------|--------|
| PbZn-miR-1 | PADG_02034/C2H2 transcription factor                                      | -22.7 kcal/mol | TRANSCRIPTION             | 0.049377 | 3' UTR |
| PbZn-miR-1 | PADG_02215/ribonuclease P/MRP protein subunit POP8                        | -24.5 kcal/mol | TRANSCRIPTION             | 0.023068 | 3' UTR |
| PbZn-miR-1 | PADG_02229/Zn(2)-C6 fungal-type domain-containing protein                 | -25.0 kcal/mol | TRANSCRIPTION             | 0.018644 | 3' UTR |
| PbZn-miR-1 | PADG_02458/DNA-directed RNA polymerase                                    | -25.6 kcal/mol | TRANSCRIPTION             | 0.014432 | 3' UTR |
| PbZn-miR-1 | PADG_04369/splicing factor U2AF 23 kDa subunit                            | -23.2 kcal/mol | TRANSCRIPTION             | 0.040012 | 3' UTR |
| PbZn-miR-1 | PADG_04404/cactin                                                         | -22.7 kcal/mol | TRANSCRIPTION             | 0.049377 | 3' UTR |
| PbZn-miR-1 | PADG_04949/Threonine-tRNA ligase                                          | -24.1 kcal/mol | TRANSCRIPTION             | 0.027341 | 3' UTR |
| PbZn-miR-1 | PADG_05396/ribonuclease H2 subunit C                                      | -24.1 kcal/mol | TRANSCRIPTION             | 0.027341 | 3' UTR |
| PbZn-miR-1 | PADG_05770/general transcription factor 3C polypeptide 5                  | -22.7 kcal/mol | TRANSCRIPTION             | 0.049377 | 3' UTR |
| PbZn-miR-1 | PADG_07755/Mediator of RNA polymerase II transcription subunit 11         | -26.8 kcal/mol | TRANSCRIPTION             | 0.008636 | 3' UTR |
| PbZn-miR-1 | PADG_07959/SAGA-associated factor 11                                      | -24.9 kcal/mol | TRANSCRIPTION             | 0.019456 | 3' UTR |
| PbZn-miR-1 | PADG_02228/ C2H2 transcription factor (AmdA)                              | -25.0 kcal/mol | TRANSCRIPTION             | 0.018644 | 5' UTR |
| PbZn-miR-1 | PADG_07602/ Suppressor of SUA7 protein 2 homolog                          | -25.0 kcal/mol | TRANSCRIPTION             | 0.018644 | 5' UTR |
| PbZn-miR-9 | PADG_00069/DNA-binding SARP family transcriptional activator              | -23.6 kcal/mol | TRANSCRIPTION             | 0.033793 | 3' UTR |
| PbZn-miR-9 | PADG_00110/HLH transcription factor                                       | -23.4 kcal/mol | TRANSCRIPTION             | 0.036774 | 3' UTR |
| PbZn-miR-9 | PADG_00272/rRNA-processing protein FCF1                                   | -23.6 kcal/mol | TRANSCRIPTION             | 0.033793 | 3' UTR |
| PbZn-miR-9 | PADG_00758/fungal specific transcription factor domain-containing protein | -22.8 kcal/mol | TRANSCRIPTION             | 0.047347 | 3' UTR |
| PbZn-miR-9 | PADG_00876/5'-3' exoribonuclease                                          | -23.1 kcal/mol | TRANSCRIPTION             | 0.041734 | 3' UTR |
| PbZn-miR-9 | PADG_01354/C2H2 transcription factor (RfeC)                               | -23.0 kcal/mol | TRANSCRIPTION             | 0.042983 | 3' UTR |
| PbZn-miR-9 | PADG_02002/Homeobox domain-containing protein                             | -23.0 kcal/mol | TRANSCRIPTION             | 0.043529 | 3' UTR |
| PbZn-miR-9 | PADG_02034/C2H2 transcription factor (AmdA)                               | -24.7 kcal/mol | TRANSCRIPTION             | 0.020917 | 3' UTR |
| PbZn-miR-9 | PADG_02116/pre-rRNA-processing protein ipi1                               | -23.4 kcal/mol | TRANSCRIPTION             | 0.037400 | 3' UTR |
| PbZn-miR-9 | PADG_02917/CCAAT-box-binding transcription factor                         | -23.0 kcal/mol | TRANSCRIPTION             | 0.043529 | 3' UTR |
| PbZn-miR-9 | PADG_03453/RNA helicase                                                   | -23.1 kcal/mol | TRANSCRIPTION             | 0.041734 | 3' UTR |
| PbZn-miR-9 | PADG_03818/JmjC domain-containing histone demethylation protein           | -23.4 kcal/mol | TRANSCRIPTION             | 0.036774 | 3' UTR |
| PbZn-miR-9 | PADG_03842/Mediator of RNA polymerase II transcription subunit 14         | -24.4 kcal/mol | TRANSCRIPTION             | 0.024070 | 3' UTR |

|            |                                                                        |                |               |          |        |
|------------|------------------------------------------------------------------------|----------------|---------------|----------|--------|
| PbZn-miR-9 | PADG_04340/DNA-directed RNA polymerase subunit beta                    | -23.3 kcal/mol | TRANSCRIPTION | 0.038359 | 3' UTR |
| PbZn-miR-9 | PADG_04546/rRNA processing protein gar2                                | -22.9 kcal/mol | TRANSCRIPTION | 0.045399 | 3' UTR |
| PbZn-miR-9 | PADG_04796/Pre-mRNA-splicing factor rse1                               | -24.1 kcal/mol | TRANSCRIPTION | 0.027341 | 3' UTR |
| PbZn-miR-9 | PADG_05585/Pre-mRNA-splicing factor syf1                               | -25.0 kcal/mol | TRANSCRIPTION | 0.018644 | 3' UTR |
| PbZn-miR-9 | PADG_05587/U2 small nuclear ribonucleoprotein B                        | -23.5 kcal/mol | TRANSCRIPTION | 0.035252 | 3' UTR |
| PbZn-miR-9 | PADG_05787/ATP-dependent RNA helicase FAL1                             | -22.9 kcal/mol | TRANSCRIPTION | 0.045399 | 3' UTR |
| PbZn-miR-9 | PADG_06038/COP9 signalosome complex subunit 2                          | -24.9 kcal/mol | TRANSCRIPTION | 0.019456 | 3' UTR |
| PbZn-miR-9 | PADG_06607/BZIP family transcription factor                            | -25.7 kcal/mol | TRANSCRIPTION | 0.013594 | 3' UTR |
| PbZn-miR-9 | PADG_07203/DNA-directed RNA polymerase III subunit RPC2                | -22.9 kcal/mol | TRANSCRIPTION | 0.045399 | 3' UTR |
| PbZn-miR-9 | PADG_07987/RING finger protein                                         | -22.9 kcal/mol | TRANSCRIPTION | 0.045399 | 3' UTR |
| PbZn-miR-9 | PADG_07993/pre-mRNA splicing factor                                    | -26.4 kcal/mol | TRANSCRIPTION | 0.010250 | 3' UTR |
| PbZn-miR-9 | PADG_08146/C2H2 transcription factor                                   | -22.9 kcal/mol | TRANSCRIPTION | 0.045399 | 3' UTR |
| PbZn-miR-9 | PADG_08283/SAP domain-containing protein                               | -26.7 kcal/mol | TRANSCRIPTION | 0.009014 | 3' UTR |
| PbZn-miR-9 | PADG_12215/transcriptional regulator Medusa                            | -24.1 kcal/mol | TRANSCRIPTION | 0.026995 | 3' UTR |
| PbZn-miR-9 | PADG_12222/U3 small nucleolar RNA-associated protein                   | -23.1 kcal/mol | TRANSCRIPTION | 0.041734 | 3' UTR |
| PbZn-miR-9 | PADG_12326/transcription factor HAP3                                   | -25.3 kcal/mol | TRANSCRIPTION | 0.016404 | 3' UTR |
| PbZn-miR-9 | PADG_12476/Nucleoside triphosphate pyrophosphohydrolase                | -24.8 kcal/mol | TRANSCRIPTION | 0.020302 | 3' UTR |
| PbZn-miR-9 | PADG_00491/ TATA-binding protein-associated factor MOT1                | -26.0 kcal/mol | TRANSCRIPTION | 0.012164 | 5' UTR |
| PbZn-miR-9 | PADG_00508/ Mediator of RNA polymerase II transcription subunit 10     | -23.0 kcal/mol | TRANSCRIPTION | 0.043529 | 5' UTR |
| PbZn-miR-9 | PADG_00533/ U2-associated protein                                      | -24.2 kcal/mol | TRANSCRIPTION | 0.026205 | 5' UTR |
| PbZn-miR-9 | PADG_00687/ transcription initiation factor TFIIB                      | -26.0 kcal/mol | TRANSCRIPTION | 0.012164 | 5' UTR |
| PbZn-miR-9 | PADG_00848/ DNA-directed RNA polymerases I, II, and III subunit RPABC1 | -23.3 kcal/mol | TRANSCRIPTION | 0.038359 | 5' UTR |
| PbZn-miR-9 | PADG_00861/U4/U6 small nuclear ribonucleoprotein PRP3                  | -23.9 kcal/mol | TRANSCRIPTION | 0.029761 | 5' UTR |
| PbZn-miR-9 | PADG_00897/ Homocitrate synthase                                       | -25.8 kcal/mol | TRANSCRIPTION | 0.013193 | 5' UTR |
| PbZn-miR-9 | PADG_01054/ C6 zinc finger domain-containing protein                   | -23.1 kcal/mol | TRANSCRIPTION | 0.041734 | 5' UTR |
| PbZn-miR-9 | PADG_01104/ DNA-directed RNA polymerase III RPC4                       | -26.3 kcal/mol | TRANSCRIPTION | 0.010698 | 5' UTR |
| PbZn-miR-9 | PADG_01105/ C6 finger domain-containing protein                        | -23.1 kcal/mol | TRANSCRIPTION | 0.041734 | 5' UTR |
| PbZn-miR-9 | PADG_01151/ DNA-directed RNA polymerase II 13.3 kDa polypeptide        | -24.2 kcal/mol | TRANSCRIPTION | 0.026205 | 5' UTR |
| PbZn-miR-9 | PADG_01170/ C2H2 zinc finger domain-containing protein                 | -23.5 kcal/mol | TRANSCRIPTION | 0.035252 | 5' UTR |

|            |                                                                                |                |               |          |        |
|------------|--------------------------------------------------------------------------------|----------------|---------------|----------|--------|
| PbZn-miR-9 | PADG_01437/ tRNA-splicing endonuclease subunit Sen15                           | -22.8 kcal/mol | TRANSCRIPTION | 0.047347 | 5' UTR |
| PbZn-miR-9 | PADG_01442/ protein STB3                                                       | -24.5 kcal/mol | TRANSCRIPTION | 0.023068 | 5' UTR |
| PbZn-miR-9 | PADG_01607/ C6 finger domain-containing protein                                | -22.7 kcal/mol | TRANSCRIPTION | 0.049377 | 5' UTR |
| PbZn-miR-9 | PADG_01630/ transcription regulator BDF1                                       | -31.5 kcal/mol | TRANSCRIPTION | 0.001147 | 5' UTR |
| PbZn-miR-9 | PADG_01691/ Histone acetyltransferase                                          | -22.8 kcal/mol | TRANSCRIPTION | 0.047347 | 5' UTR |
| PbZn-miR-9 | PADG_01892/ pre-mRNA-processing factor 40                                      | -24.8 kcal/mol | TRANSCRIPTION | 0.020302 | 5' UTR |
| PbZn-miR-9 | PADG_02185/ C3HC4 zinc finger domain-containing protein                        | -23.1 kcal/mol | TRANSCRIPTION | 0.041734 | 5' UTR |
| PbZn-miR-9 | PADG_02308/ pre-mRNA-splicing factor ATP-dependent RNA helicase PRP43          | -22.9 kcal/mol | TRANSCRIPTION | 0.045399 | 5' UTR |
| PbZn-miR-9 | PADG_02356/ RNA polymerase I-specific transcription initiation factor RRN6     | -24.8 kcal/mol | TRANSCRIPTION | 0.020302 | 5' UTR |
| PbZn-miR-9 | PADG_02543/ putative U6 snRNA phosphodiesterase                                | -22.9 kcal/mol | TRANSCRIPTION | 0.045399 | 5' UTR |
| PbZn-miR-9 | PADG_02948/ nuclear RNA binding protein                                        | -23.1 kcal/mol | TRANSCRIPTION | 0.041559 | 5' UTR |
| PbZn-miR-9 | PADG_02996/ PAB1 binding protein                                               | -25.4 kcal/mol | TRANSCRIPTION | 0.015719 | 5' UTR |
| PbZn-miR-9 | PADG_03195/ KRR1 small subunit processome component                            | -23.0 kcal/mol | TRANSCRIPTION | 0.043529 | 5' UTR |
| PbZn-miR-9 | PADG_03295/ HLH transcription factor                                           | -26.4 kcal/mol | TRANSCRIPTION | 0.010119 | 5' UTR |
| PbZn-miR-9 | PADG_03502/ C6 finger domain-containing protein                                | -25.1 kcal/mol | TRANSCRIPTION | 0.017866 | 5' UTR |
| PbZn-miR-9 | PADG_03731/ fungal specific transcription factor                               | -23.7 kcal/mol | TRANSCRIPTION | 0.032393 | 5' UTR |
| PbZn-miR-9 | PADG_03883/ Sin3 complex subunit                                               | -23.5 kcal/mol | TRANSCRIPTION | 0.035252 | 5' UTR |
| PbZn-miR-9 | PADG_03966/ HCNGP domain-containing protein                                    | -24.4 kcal/mol | TRANSCRIPTION | 0.024070 | 5' UTR |
| PbZn-miR-9 | PADG_04031/ tRNA (guanine-N(7)-)-methyltransferase non-catalytic subunit TRM82 | -23.2 kcal/mol | TRANSCRIPTION | 0.040012 | 5' UTR |
| PbZn-miR-9 | PADG_04039/ protein vts1                                                       | -24.5 kcal/mol | TRANSCRIPTION | 0.022970 | 5' UTR |
| PbZn-miR-9 | PADG_04186/ SRF-type transcription factor RImA                                 | -23.5 kcal/mol | TRANSCRIPTION | 0.035853 | 5' UTR |
| PbZn-miR-9 | PADG_04369/ splicing factor U2AF 23 kDa subunit                                | -23.5 kcal/mol | TRANSCRIPTION | 0.035252 | 5' UTR |
| PbZn-miR-9 | PADG_04378/ DNA-directed RNA polymerase III subunit RPC6                       | -22.8 kcal/mol | TRANSCRIPTION | 0.047347 | 5' UTR |
| PbZn-miR-9 | PADG_04436/ RNA-binding protein 8A                                             | -22.7 kcal/mol | TRANSCRIPTION | 0.049377 | 5' UTR |
| PbZn-miR-9 | PADG_04616/ smad nuclear-interacting protein 1                                 | -22.7 kcal/mol | TRANSCRIPTION | 0.049377 | 5' UTR |
| PbZn-miR-9 | PADG_04665/C2H2 finger domain-containing protein                               | -23.5 kcal/mol | TRANSCRIPTION | 0.035252 | 5' UTR |
| PbZn-miR-9 | PADG_04672/ ATP-dependent RNA helicase SUB2                                    | -23.0 kcal/mol | TRANSCRIPTION | 0.042983 | 5' UTR |
| PbZn-miR-9 | PADG_05095/ Nucleolar protein 58                                               | -23.9 kcal/mol | TRANSCRIPTION | 0.029761 | 5' UTR |
| PbZn-miR-9 | PADG_05221/ Polyadenylation factor subunit 2                                   | -22.7 kcal/mol | TRANSCRIPTION | 0.049170 | 5' UTR |

|            |                                                                                                 |                |               |          |        |
|------------|-------------------------------------------------------------------------------------------------|----------------|---------------|----------|--------|
| PbZn-miR-9 | PADG_05585/ Pre-mRNA-splicing factor syf1                                                       | -23.1 kcal/mol | TRANSCRIPTION | 0.041734 | 5' UTR |
| PbZn-miR-9 | PADG_05597/ C6 finger domain transcription factor nscR                                          | -23.0 kcal/mol | TRANSCRIPTION | 0.043529 | 5' UTR |
| PbZn-miR-9 | PADG_05900/ Transcription elongation factor 1 homolog                                           | -24.2 kcal/mol | TRANSCRIPTION | 0.026205 | 5' UTR |
| PbZn-miR-9 | PADG_06433/ Transcription initiation factor TFIID subunit 8                                     | -24.1 kcal/mol | TRANSCRIPTION | 0.027341 | 5' UTR |
| PbZn-miR-9 | PADG_06697/ Poly(A) polymerase                                                                  | -23.4 kcal/mol | TRANSCRIPTION | 0.036774 | 5' UTR |
| PbZn-miR-9 | PADG_06824/C6 transcription factor                                                              | -25.1 kcal/mol | TRANSCRIPTION | 0.017866 | 5' UTR |
| PbZn-miR-9 | PADG_06900/ RING finger domain-containing protein                                               | -24.2 kcal/mol | TRANSCRIPTION | 0.026205 | 5' UTR |
| PbZn-miR-9 | PADG_06912/ subunit of DNA polymerase II                                                        | -23.6 kcal/mol | TRANSCRIPTION | 0.033226 | 5' UTR |
| PbZn-miR-9 | PADG_06916/ transcriptional regulation of mitochondrial recombination-domain-containing protein | -24.3 kcal/mol | TRANSCRIPTION | 0.025008 | 5' UTR |
| PbZn-miR-9 | PADG_07126/ RING finger domain-containing protein                                               | -23.6 kcal/mol | TRANSCRIPTION | 0.033793 | 5' UTR |
| PbZn-miR-9 | PADG_07145/ CTD kinase subunit 3                                                                | -25.2 kcal/mol | TRANSCRIPTION | 0.017119 | 5' UTR |
| PbZn-miR-9 | PADG_07267/ C6 finger domain transcription factor nscR                                          | -24.1 kcal/mol | TRANSCRIPTION | 0.027341 | 5' UTR |
| PbZn-miR-9 | PADG_07379/ transcription factor RfeG                                                           | -23.4 kcal/mol | TRANSCRIPTION | 0.036774 | 5' UTR |
| PbZn-miR-9 | PADG_07483/ Histone acetyltransferase                                                           | -22.8 kcal/mol | TRANSCRIPTION | 0.047149 | 5' UTR |
| PbZn-miR-9 | PADG_07509/ transcription initiation factor TFIID subunit 6                                     | -22.7 kcal/mol | TRANSCRIPTION | 0.049377 | 5' UTR |
| PbZn-miR-9 | PADG_07529/Queuine tRNA-ribosyltransferase accessory subunit 2                                  | -23.3 kcal/mol | TRANSCRIPTION | 0.038359 | 5' UTR |
| PbZn-miR-9 | PADG_07755/ Mediator of RNA polymerase II transcription subunit 11                              | -22.9 kcal/mol | TRANSCRIPTION | 0.045399 | 5' UTR |
| PbZn-miR-9 | PADG_08069/ FACT complex subunit spt16                                                          | -27.2 kcal/mol | TRANSCRIPTION | 0.007275 | 5' UTR |
| PbZn-miR-9 | PADG_08441/ FF domain-containing protein                                                        | -25.9 kcal/mol | TRANSCRIPTION | 0.012695 | 5' UTR |
| PbZn-miR-9 | PADG_08499/ mRNA (guanine-N(7)-)-methyltransferase                                              | -23.4 kcal/mol | TRANSCRIPTION | 0.036774 | 5' UTR |
| PbZn-miR-9 | PADG_11068/ RNA interference and silencing protein                                              | -23.9 kcal/mol | TRANSCRIPTION | 0.029761 | 5' UTR |
| PbZn-miR-9 | PADG_11264/ C6 finger domain transcription factor nscR                                          | -24.4 kcal/mol | TRANSCRIPTION | 0.024070 | 5' UTR |
| PbZn-miR-9 | PADG_11344/ C2H2 finger domain-containing protein                                               | -24.1 kcal/mol | TRANSCRIPTION | 0.027341 | 5' UTR |
| PbZn-miR-9 | PADG_11352/ transcription factor RfeF                                                           | -24.6 kcal/mol | TRANSCRIPTION | 0.022107 | 5' UTR |
| PbZn-miR-9 | PADG_11415/ RXT2-like protein                                                                   | -23.2 kcal/mol | TRANSCRIPTION | 0.040012 | 5' UTR |
| PbZn-miR-9 | PADG_11500/ C6 finger domain transcription factor nscR                                          | -23.1 kcal/mol | TRANSCRIPTION | 0.041734 | 5' UTR |
| PbZn-miR-9 | PADG_11586/ RNA-dependent RNA polymerase                                                        | -26.5 kcal/mol | TRANSCRIPTION | 0.009820 | 5' UTR |
| PbZn-miR-9 | PADG_11710/ PWI domain-containing protein                                                       | -31.4 kcal/mol | TRANSCRIPTION | 0.001197 | 5' UTR |
| PbZn-miR-9 | PADG_12197/ nucleolar protein NOP58                                                             | -24.1 kcal/mol | TRANSCRIPTION | 0.027341 | 5' UTR |

|            |                                                                            |                |               |          |        |
|------------|----------------------------------------------------------------------------|----------------|---------------|----------|--------|
| PbZn-miR-9 | PADG_12218/ 3' exoribonuclease                                             | -25.0 kcal/mol | TRANSCRIPTION | 0.018644 | 5' UTR |
| PbZn-miR-9 | PADG_12256/ fungal specific transcription factor domain-containing protein | -24.2 kcal/mol | TRANSCRIPTION | 0.026205 | 5' UTR |
| PbZn-miR-9 | PADG_05322/ ZIP metal ion transporter (zrt3)                               | -23.5 kcal/mol | Transport     | 0.035252 | 5' UTR |
| PbZn-miR-9 | PADG_08196/ Vacuolar membrane zinc transporter (cot1)                      | -24.3 kcal/mol | Transport     | 0.025115 | 5' UTR |
| PbZn-miR-9 | PADG_04903/ Mitochondrial iron transporter                                 | -24.2 kcal/mol | Transport     | 0.026205 | 3' UTR |
