# Supplementary material for: Global Molecular Response of Paracoccidioides brasiliensis to Zinc Deprivation: Analyses at Transcript, Protein and MicroRNA Levels
Source: MDPI journal article supplement (doi:10.3390/jof9030281), 2023-02-21
Supplement: s1 [file s1]

**Table S7.** Transcripts repressed during zinc deprivation.

| GenBank Accession <i>P. brasiliensis</i> (Pb18)                | Protein                                            | Metals                    | Fold change |
|----------------------------------------------------------------|----------------------------------------------------|---------------------------|-------------|
| METABOLISM                                                     |                                                    |                           |             |
| amino acid metabolism                                          |                                                    |                           |             |
| PADG_03859                                                     | Putative sorbitol (alcohol)-dehydrogenase          | Zn, Cd, Na, Ca, Mn        | -0.6763895  |
| PADG_04516                                                     | Glutamate dehydrogenase                            | K                         | -0.7372061  |
| nucleotide/nucleoside/nucleobase metabolism                    |                                                    |                           |             |
| PADG_01017                                                     | CAF1 family ribonuclease                           |                           | -0.6665615  |
| PADG_02839                                                     | O-methyltransferase                                | Ca, Zn, Mg, K, Ni, Na, Mn | -0.6043833  |
| ENERGY                                                         |                                                    |                           |             |
| electron transport and membrane-associated energy conservation |                                                    |                           |             |
| PADG_03258                                                     | lipid A export ATP-binding/permease protein msbA   | Na, V, Hg, Mg             | -0.7489959  |
| PADG_04572                                                     | SCY1 protein kinase                                |                           | -0.6092240  |
| Fermentation                                                   |                                                    |                           |             |
| PADG_01174                                                     | alcohol dehydrogenase                              | Zn                        | -0.8771634  |
| CELL CYCLE AND DNA PROCESSING                                  |                                                    |                           |             |
| PADG_07768                                                     | UV excision repair protein                         |                           | -0.5859608  |
| PADG_11749                                                     | DNA-directed RNA polymerase II 138 Kda polypeptide |                           | -0.6142618  |
| PADG_11750                                                     | CCCH zinc finger DNA binding protein               |                           | -0.6840303  |
| TRANSCRIPTION                                                  |                                                    |                           |             |
| PADG_00411                                                     | C6 transcription factor (Ctf1B)                    |                           | -0.8671628  |
| PADG_02012                                                     | 3-deoxy-7-phosphoheptulonate synthase              |                           | -0.6316335  |
| PADG_04314                                                     | hemagglutinin protein                              |                           | -0.7204081  |
| PADG_04600                                                     | AP-1-like transcription factor                     |                           | -0.6805913  |
| PADG_05470                                                     | C6 transcription factor                            |                           | -0.6195290  |
| PROTEIN FATE (folding, modification, destination)              |                                                    |                           |             |

|                                                               |                                             |                 |            |
|---------------------------------------------------------------|---------------------------------------------|-----------------|------------|
| protein folding and stabilization                             |                                             |                 |            |
| PADG_00517                                                    | DnaJ domain-containing protein              |                 | -0.6413279 |
| CELLULAR TRANSPORT, TRANSPORT FACILITIES AND TRANSPORT ROUTES |                                             |                 |            |
| PADG_02707                                                    | Mg2 transporter protein CorA family protein |                 | -0.5924410 |
| PADG_04197                                                    | ABC transporter CDR4                        | Mg, Na , Ni, Pt | -1         |
| CELLULAR COMMUNICATION/SIGNAL TRANSDUCTION MECHANISM          |                                             |                 |            |
| PADG_06708                                                    | F-box domain containing protein             |                 | -0.7947586 |
| PADG_07981                                                    | ankyrin repeat domain protein, putative     | Mg, Na          | -0.5957269 |
| CELL RESCUE, DEFENSE AND VIRULENCE                            |                                             |                 |            |
| PADG_12387                                                    | fluconazole resistance protein              |                 | -1         |
| BIOGENESIS OF CELLULAR COMPONENTS                             |                                             |                 |            |
| PADG_01807                                                    | integral membrane protein                   |                 | -0.7176654 |
| PADG_03130                                                    | Myosin-10                                   |                 | -0.6687912 |
| PADG_04499                                                    | cell wall protein ECM33 precursor           |                 | -1         |
| UNCLASSIFIED PROTEINS                                         |                                             |                 |            |
| PADG_02365                                                    | Uncharacterized protein                     |                 | -0.6620554 |
| PADG_03348                                                    | Uncharacterized protein                     |                 | -0.8722472 |
| PADG_05949                                                    | Uncharacterized protein                     |                 | -0.7440966 |
| PADG_11100                                                    | Uncharacterized protein                     |                 | -1         |
| PADG_11724                                                    | Uncharacterized protein                     |                 | -0.7259224 |
| PADG_12424                                                    | Uncharacterized protein                     |                 | -0.8216202 |
