# Supplementary material for: Global Molecular Response of Paracoccidioides brasiliensis to Zinc Deprivation: Analyses at Transcript, Protein and MicroRNA Levels
Source: MDPI journal article supplement (doi:10.3390/jof9030281), 2023-02-21
Supplement: s1 [file s1]

**Table S6.** Transcripts induced during zinc deprivation.

| GenBank Accession <i>P. brasiliensis</i>                       | Protein                                                   | Metals    | Fold change |
|----------------------------------------------------------------|-----------------------------------------------------------|-----------|-------------|
| METABOLISM                                                     |                                                           |           |             |
| amino acid metabolism                                          |                                                           |           |             |
| PADG_01834                                                     | GGACT domain-containing protein                           |           | 0.5980568   |
| PADG_03513                                                     | Methyltransf_11 domain-containing protein                 | Na        | 0.5931847   |
| PADG_05198                                                     | Pyridoxal 5'-phosphate synthase, glutaminase subunit Pdx2 |           | 0.6175450   |
| ENERGY                                                         |                                                           |           |             |
| glycolysis and gluconeogenesis                                 |                                                           |           |             |
| PADG_03071                                                     | PEP phosphonomutase                                       |           | 0.6640193   |
| electron transport and membrane-associated energy conservation |                                                           |           |             |
| PADG_08666                                                     | ATP synthase subunit K                                    |           | 1           |
| TRANSCRIPTION                                                  |                                                           |           |             |
| PADG_07162                                                     | U6 snRNA-associated Sm-like protein LSm4                  |           | 0.6442036   |
| PADG_12476                                                     | Nucleoside triphosphate pyrophosphohydrolase              |           | 0.6213017   |
| PADG_07993                                                     | pre-mRNA splicing factor                                  | Ni, Mg, K | 0.5997856   |
| PROTEIN SYNTHESIS                                              |                                                           |           |             |
| ribosome biogenesis                                            |                                                           |           |             |
| PADG_04588                                                     | 60S ribosomal protein L22                                 |           | 0.6558204   |
| Translation                                                    |                                                           |           |             |
| PADG_00806                                                     | BTB domain-containing protein                             |           | 0.6141178   |
| PADG_12047                                                     | tRNA-Phe                                                  |           | 0.7027423   |
| aminoacyl-tRNA-synthetases                                     |                                                           |           |             |
| PADG_05841                                                     | peptidyl-tRNA hydrolase                                   |           | 0.5949724   |
| PROTEIN FATE (folding, modification, destination)              |                                                           |           |             |

|                                                                                 |                                                |                   |           |
|---------------------------------------------------------------------------------|------------------------------------------------|-------------------|-----------|
| PADG_00806                                                                      | Kelch-like protein 38                          |                   | 0.6141178 |
| PADG_12469                                                                      | 26S proteasome non-ATPase regulatory subunit 6 |                   | 0.6218737 |
| PROTEIN WITH BINDING FUNCTION OR COFACTOR REQUIREMENT (structural or catalytic) |                                                |                   |           |
| nucleic acid binding                                                            |                                                |                   |           |
| PADG_12474                                                                      | C2H2 finger domain-containing protein          |                   | 0.6910646 |
| CELLULAR TRANSPORT, TRANSPORT FACILITIES AND TRANSPORT ROUTES                   |                                                |                   |           |
| PADG_06417                                                                      | zinc-regulated transporter 2 (ZRT2)            | Zn                | 0.8711713 |
| PADG_06430                                                                      | pyridoxal-5'-phosphate-dependent enzyme        | Mg, Ca, Na, K, Mn | 0.6199204 |
| CELL RESCUE, DEFENSE AND VIRULENCE                                              |                                                |                   |           |
| PADG_12219                                                                      | TRI7                                           |                   | 0.6045995 |
| UNCLASSIFIED PROTEINS                                                           |                                                |                   |           |
| PADG_01117                                                                      | Uncharacterized protein                        |                   | 0.6219716 |
| PADG_04857                                                                      | Uncharacterized protein                        |                   | 0.7014952 |
| PADG_08487                                                                      | Uncharacterized protein                        |                   | 1         |
| PADG_11055                                                                      | Uncharacterized protein                        |                   | 0.7078537 |
| PADG_12475                                                                      | Uncharacterized protein                        |                   | 0.6403045 |
